# Supplementary material for: Hair cortisol concentrations correlate negatively with survival in a wild primate population
Source: Springer Nature journal article supplement (doi:10.1186/s12898-017-0140-1), 2017-08-14
Supplement: MOESM1 [file 12898_2017_140_MOESM1_ESM.pdf]

**Full set of starting candidate models.**

We considered the following factors: condition index ( $c$ , which can indicate HCC or SMI values), sex ( $s$ ), and time ( $t$ ). Constant parameters are noted (.). Interactions are indicated by (\*) and additive effects by (+). All possible combinations of parameters given below were modelled and tested. Global models are in bold.

| Survival probability $\Phi$                                                                                                   | Recapture probability $p$ | State-transition probability $\psi$ |
|-------------------------------------------------------------------------------------------------------------------------------|---------------------------|-------------------------------------|
| <i>Semi-annual survival (Multistate models)</i>                                                                               |                           |                                     |
| <b><math>c * s + t</math></b>                                                                                                 | <b><math>s + t</math></b> | <b><math>c * t</math></b>           |
| $c + s + t$                                                                                                                   | $t$                       | $c$                                 |
| $c * s$                                                                                                                       | (.)                       |                                     |
| $c + s$                                                                                                                       |                           |                                     |
| $c + t$                                                                                                                       |                           |                                     |
| $s + t$                                                                                                                       |                           |                                     |
| $c$                                                                                                                           |                           |                                     |
| $s$                                                                                                                           |                           |                                     |
| $t$                                                                                                                           |                           |                                     |
| <i>Monthly survival (Cormack-Jolly-Seber models where explanatory variables were later added as an individual covariates)</i> |                           |                                     |
| <b><math>s * t</math></b>                                                                                                     | <b><math>s + t</math></b> |                                     |
| $s + t$                                                                                                                       | $s$                       |                                     |
| $s$                                                                                                                           | $t$                       |                                     |
| $t$                                                                                                                           | (.)                       |                                     |
| (.)                                                                                                                           |                           |                                     |
