# Supplementary material for: Hair cortisol concentrations correlate negatively with survival in a wild primate population
Source: Springer Nature journal article supplement (doi:10.1186/s12898-017-0140-1), 2017-08-14
Supplement: MOESM2 [file 12898_2017_140_MOESM2_ESM.pdf]

**Confidence set of models (all models with relative likelihood > 0.05) for semi-annual survival of *M. murinus* depending on hair cortisol concentration.**

Presented are the number of parameters (K), the deviance (QDEV), the quasi-likelihood adjusted second order AIC (QAICc), the difference between the QAICc of the top model and a given model  $i$  ( $\Delta_i$ ) and the Akaike weights ( $w_i$ ).

| Rank                                          | Model                          | K  | QDEV   | QAICc  | $\Delta_i$ | $w_i$ |
|-----------------------------------------------|--------------------------------|----|--------|--------|------------|-------|
| <i>Categorization cut-off: median</i>         |                                |    |        |        |            |       |
| 1                                             | $\Phi(c) p(t) \psi(c)$         | 8  | 200.78 | 515.10 | 0          | 0.208 |
| 2                                             | $\Phi(s) p(t) \psi(c)$         | 8  | 201.90 | 516.23 | 1.13       | 0.119 |
| 3                                             | $\Phi(c + s) p(t) \psi(c)$     | 9  | 199.96 | 516.44 | 1.34       | 0.107 |
| 4                                             | $\Phi(c) p(.) \psi(c)$         | 5  | 208.91 | 516.88 | 1.77       | 0.086 |
| 5                                             | $\Phi(c) p(s + t) \psi(c)$     | 9  | 200.73 | 517.21 | 2.11       | 0.072 |
| 6                                             | $\Phi(s) p(.) \psi(c)$         | 5  | 210.01 | 517.98 | 2.87       | 0.050 |
| 7                                             | $\Phi(t) p(t) \psi(c)$         | 10 | 199.40 | 518.06 | 2.96       | 0.048 |
| 8                                             | $\Phi(c + t) p(t) \psi(c)$     | 11 | 197.29 | 518.15 | 3.05       | 0.045 |
| 9                                             | $\Phi(c + s) p(.) \psi(c)$     | 6  | 208.16 | 518.23 | 3.12       | 0.044 |
| 10                                            | $\Phi(s) p(s + t) \psi(c)$     | 9  | 201.84 | 518.32 | 3.22       | 0.042 |
| 11                                            | $\Phi(c + s) p(s + t) \psi(c)$ | 10 | 199.86 | 518.52 | 3.42       | 0.038 |
| 12                                            | $\Phi(c * s) p(t) \psi(c)$     | 10 | 199.88 | 518.54 | 3.44       | 0.037 |
| 13                                            | $\Phi(s + t) p(t) \psi(c)$     | 11 | 198.81 | 519.67 | 4.57       | 0.021 |
| 14                                            | $\Phi(t) p(s + t) \psi(c)$     | 11 | 198.96 | 519.81 | 4.71       | 0.020 |
| 15                                            | $\Phi(c + s + t) p(t) \psi(c)$ | 12 | 196.76 | 519.84 | 4.74       | 0.020 |
| 16                                            | $\Phi(c + t) p(s + t) \psi(c)$ | 12 | 197.09 | 520.16 | 5.06       | 0.017 |
| 17                                            | $\Phi(c * s) p(.) \psi(c)$     | 7  | 208.10 | 520.29 | 5.19       | 0.016 |
| 18                                            | $\Phi(c * s) p(s + t) \psi(c)$ | 11 | 199.80 | 520.66 | 5.56       | 0.013 |
| <i>Categorization cut-off: third quartile</i> |                                |    |        |        |            |       |
| 1                                             | $\Phi(c) p(t) \psi(c)$         | 8  | 146.94 | 465.86 | 0          | 0.230 |
| 2                                             | $\Phi(c + s) p(t) \psi(c)$     | 9  | 146.08 | 467.16 | 1.30       | 0.120 |
| 3                                             | $\Phi(c) p(.) \psi(c)$         | 5  | 154.75 | 467.31 | 1.45       | 0.111 |
| 4                                             | $\Phi(s) p(t) \psi(c)$         | 8  | 148.66 | 467.59 | 1.73       | 0.097 |
| 5                                             | $\Phi(c) p(s + t) \psi(c)$     | 9  | 146.88 | 467.97 | 2.11       | 0.080 |
| 6                                             | $\Phi(c + s) p(.) \psi(c)$     | 6  | 153.97 | 468.63 | 2.77       | 0.058 |
| 7                                             | $\Phi(c + s) p(s + t) \psi(c)$ | 10 | 145.98 | 469.24 | 3.38       | 0.042 |
| 8                                             | $\Phi(c * s) p(t) \psi(c)$     | 10 | 146.00 | 469.26 | 3.40       | 0.042 |
| 9                                             | $\Phi(s) p(.) \psi(c)$         | 5  | 156.72 | 469.28 | 3.42       | 0.042 |
| 10                                            | $\Phi(t) p(t) \psi(c)$         | 10 | 146.17 | 469.44 | 3.57       | 0.038 |
| 11                                            | $\Phi(s) p(s + t) \psi(c)$     | 9  | 148.60 | 469.69 | 3.82       | 0.034 |
| 12                                            | $\Phi(c + t) p(t) \psi(c)$     | 11 | 144.88 | 470.34 | 4.47       | 0.025 |
| 13                                            | $\Phi(c * s) p(.) \psi(c)$     | 7  | 153.89 | 470.68 | 4.81       | 0.021 |
| 14                                            | $\Phi(s + t) p(t) \psi(c)$     | 11 | 145.60 | 471.06 | 5.19       | 0.017 |
| 15                                            | $\Phi(t) p(s + t) \psi(c)$     | 11 | 145.74 | 471.20 | 5.33       | 0.016 |
| 16                                            | $\Phi(c * s) p(s + t) \psi(c)$ | 11 | 145.91 | 471.37 | 5.51       | 0.015 |
| 17                                            | $\Phi(s + t) p(.) \psi(c)$     | 8  | 152.78 | 471.71 | 5.84       | 0.012 |
