# Supplementary material for: Hair cortisol concentrations correlate negatively with survival in a wild primate population
Source: Springer Nature journal article supplement (doi:10.1186/s12898-017-0140-1), 2017-08-14
Supplement: MOESM3 [file 12898_2017_140_MOESM3_ESM.pdf]

**Confidence set of models (all models with relative likelihood > 0.05) for semi-annual survival of *M. murinus* depending on scaled mass index.**

Presented are the number of parameters (K), the deviance (QDEV), the quasi-likelihood adjusted second order AIC (QAICc), the difference between the QAICc of the top model and a given model  $i$  ( $\Delta_i$ ) and the Akaike weights ( $w_i$ ).

| Rank                                          | Model                          | K  | QDEV   | QAICc  | $\Delta_i$ | $w_i$ |
|-----------------------------------------------|--------------------------------|----|--------|--------|------------|-------|
| <i>Categorization cut-off: median</i>         |                                |    |        |        |            |       |
| 1                                             | $\Phi(s) p(t) \psi(c)$         | 7  | 114.35 | 330.82 | 0          | 0.272 |
| 2                                             | $\Phi(c) p(t) \psi(c)$         | 7  | 115.44 | 331.90 | 1.09       | 0.158 |
| 3                                             | $\Phi(s) p(s + t) \psi(c)$     | 8  | 114.31 | 332.96 | 2.14       | 0.093 |
| 4                                             | $\Phi(c + s) p(t) \psi(c)$     | 8  | 114.35 | 332.99 | 2.18       | 0.092 |
| 5                                             | $\Phi(c) p(s + t) \psi(c)$     | 8  | 115.01 | 333.65 | 2.84       | 0.066 |
| 6                                             | $\Phi(t) p(t) \psi(c)$         | 8  | 115.36 | 334.01 | 3.19       | 0.055 |
| 7                                             | $\Phi(c * s) p(t) \psi(c)$     | 9  | 113.72 | 334.56 | 3.75       | 0.042 |
| 8                                             | $\Phi(t) p(.) \psi(c)$         | 6  | 120.63 | 334.94 | 4.12       | 0.035 |
| 9                                             | $\Phi(s) p(.) \psi(c)$         | 5  | 122.92 | 335.10 | 4.29       | 0.032 |
| 10                                            | $\Phi(s + t) p(t) \psi(c)$     | 9  | 114.28 | 335.13 | 4.31       | 0.031 |
| 11                                            | $\Phi(c + s) p(s + t) \psi(c)$ | 9  | 114.31 | 335.15 | 4.34       | 0.031 |
| 12                                            | $\Phi(t) p(s + t) \psi(c)$     | 9  | 114.98 | 335.83 | 5.01       | 0.022 |
| 13                                            | $\Phi(c) p(.) \psi(c)$         | 5  | 123.82 | 336.00 | 5.18       | 0.020 |
| 14                                            | $\Phi(c + t) p(t) \psi(c)$     | 9  | 115.29 | 336.14 | 5.32       | 0.019 |
| 15                                            | $\Phi(s + t) p(.) \psi(c)$     | 7  | 119.72 | 336.19 | 5.37       | 0.019 |
| 16                                            | $\Phi(c * s) p(s + t) \psi(c)$ | 10 | 113.67 | 336.74 | 5.92       | 0.014 |
| <i>Categorization cut-off: third quartile</i> |                                |    |        |        |            |       |
| 1                                             | $\Phi(c) p(t) \psi(c)$         | 7  | 102.53 | 323.87 | 0          | 0.229 |
| 2                                             | $\Phi(c + s) p(t) \psi(c)$     | 8  | 101.34 | 324.85 | 0.99       | 0.140 |
| 3                                             | $\Phi(s) p(t) \psi(c)$         | 7  | 103.72 | 325.06 | 1.19       | 0.127 |
| 4                                             | $\Phi(c) p(s + t) \psi(c)$     | 8  | 102.03 | 325.55 | 1.68       | 0.099 |
| 5                                             | $\Phi(c + s) p(s + t) \psi(c)$ | 9  | 101.28 | 327.00 | 3.13       | 0.048 |
| 6                                             | $\Phi(c * s) p(t) \psi(c)$     | 9  | 101.34 | 327.05 | 3.19       | 0.047 |
| 7                                             | $\Phi(s) p(s + t) \psi(c)$     | 8  | 103.68 | 327.20 | 3.33       | 0.043 |
| 8                                             | $\Phi(c) p(.) \psi(c)$         | 5  | 110.64 | 327.69 | 3.83       | 0.034 |
| 9                                             | $\Phi(c + t) p(t) \psi(c)$     | 9  | 102.51 | 328.22 | 4.36       | 0.026 |
| 10                                            | $\Phi(t) p(t) \psi(c)$         | 8  | 104.73 | 328.24 | 4.38       | 0.026 |
| 11                                            | $\Phi(c) p(t) \psi(c * t)$     | 11 | 98.10  | 328.28 | 4.42       | 0.025 |
| 12                                            | $\Phi(c + t) p(.) \psi(c)$     | 7  | 107.43 | 328.77 | 4.90       | 0.020 |
| 13                                            | $\Phi(c + s) p(.) \psi(c)$     | 6  | 109.63 | 328.81 | 4.95       | 0.019 |
| 14                                            | $\Phi(t) p(.) \psi(c)$         | 6  | 110.00 | 329.18 | 5.31       | 0.016 |
| 15                                            | $\Phi(c * s) p(s + t) \psi(c)$ | 10 | 101.28 | 329.22 | 5.36       | 0.016 |

continued

| Rank                                          | Model                          | K  | QDEV   | QAICc  | $\Delta_i$ | $w_i$ |
|-----------------------------------------------|--------------------------------|----|--------|--------|------------|-------|
| <i>Categorization cut-off: third quartile</i> |                                |    |        |        |            |       |
| 16                                            | $\Phi(c + s + t) p(t) \psi(c)$ | 10 | 101.33 | 329.27 | 5.40       | 0.015 |
| 17                                            | $\Phi(s) p(.) \psi(c)$         | 5  | 112.29 | 329.34 | 5.48       | 0.015 |
| 18                                            | $\Phi(s) p(t) \psi(c * t)$     | 11 | 99.16  | 329.35 | 5.48       | 0.015 |
| 19                                            | $\Phi(s + t) p(t) \psi(c)$     | 9  | 103.65 | 329.37 | 5.50       | 0.015 |
| 20                                            | $\Phi(c + t) p(t) \psi(c * t)$ | 12 | 97.01  | 329.47 | 5.60       | 0.014 |
| 21                                            | $\Phi(c + s + t) p(.) \psi(c)$ | 8  | 106.24 | 329.76 | 5.89       | 0.012 |
