# Supplementary material for: Hair cortisol concentrations correlate negatively with survival in a wild primate population
Source: Springer Nature journal article supplement (doi:10.1186/s12898-017-0140-1), 2017-08-14
Supplement: MOESM4 [file 12898_2017_140_MOESM4_ESM.pdf]

**Starting set of models for monthly survival assessment of *M. murinus*.**

Presented are the number of parameters (K), the deviance (DEV), the second order AIC (AICc), the difference between the AICc of the top model and a given model  $i$  ( $\Delta_i$ ) and the Akaike weights ( $w_i$ ) for the total set including the global model (in bold).

| Rank     | Model                                      | K         | DEV          | AICc          | $\Delta_i$   | $w_i$        |
|----------|--------------------------------------------|-----------|--------------|---------------|--------------|--------------|
| 1        | $\Phi(t) p(t)$                             | 9         | 16.06        | 218.01        | 0            | 0.562        |
| 2        | $\Phi(t) p(s + t)$                         | 10        | 15.89        | 220.20        | 2.19         | 0.188        |
| 3        | $\Phi(s + t) p(t)$                         | 10        | 15.97        | 220.28        | 2.28         | 0.180        |
| 4        | $\Phi(s + t) p(s + t)$                     | 11        | 15.89        | 222.60        | 4.60         | 0.056        |
| 5        | $\Phi(.) p(t)$                             | 6         | 32.52        | 227.61        | 9.60         | 0.005        |
| 6        | $\Phi(s * t) p(t)$                         | 14        | 13.51        | 227.71        | 9.70         | 0.004        |
| 7        | $\Phi(s) p(t)$                             | 7         | 32.45        | 229.78        | 11.78        | 0.002        |
| 8        | $\Phi(.) p(s + t)$                         | 7         | 32.51        | 229.84        | 11.84        | 0.002        |
| <b>9</b> | <b><math>\Phi(s * t) p(s + t)^*</math></b> | <b>15</b> | <b>13.49</b> | <b>230.27</b> | <b>12.27</b> | <b>0.001</b> |
| 10       | $\Phi(s) p(s + t)$                         | 8         | 32.44        | 232.06        | 14.05        | 0.001        |
| 11       | $\Phi(t) p(.)$                             | 4         | 51.38        | 242.09        | 24.09        | 0.000        |
| 12       | $\Phi(t) p(s)$                             | 7         | 51.22        | 248.55        | 30.55        | 0.000        |
| 13       | $\Phi(s + t) p(.)$                         | 7         | 51.38        | 248.72        | 30.71        | 0.000        |
| 14       | $\Phi(s + t) p(s)$                         | 8         | 51.21        | 250.83        | 32.83        | 0.000        |
| 15       | $\Phi(s * t) p(.)$                         | 11        | 51.26        | 257.98        | 39.97        | 0.000        |
| 16       | $\Phi(s * t) p(s)$                         | 12        | 51.12        | 260.29        | 42.28        | 0.000        |
| 17       | $\Phi(.) p(.)$                             | 2         | 83.32        | 269.79        | 51.79        | 0.000        |
| 18       | $\Phi(.) p(s)$                             | 3         | 83.19        | 271.77        | 53.77        | 0.000        |
| 19       | $\Phi(s) p(.)$                             | 3         | 83.32        | 271.89        | 53.89        | 0.000        |
| 20       | $\Phi(s) p(s)$                             | 4         | 83.19        | 273.90        | 55.90        | 0.000        |
